# Supplementary material
Source: PubMed Central journal article supplement (PMC3254824)

## SUPPORTING INFORMATION for

### Smith and Jackman "Kinetic analysis of 3'-5' nucleotide addition catalyzed by eukaryotic tRNA<sup>His</sup> guanylyltransferase"

#### Supporting information figure legends

**Figure S1: Single turnover enzyme dependence of adenylylation at pH 7.5.** (A) Reactions were carried out with 4 mM ATP and limiting 5'-[<sup>32</sup>P]tRNA<sup>His</sup> in the presence of 0.6 (▲), 1 (+), 3 (×), 5 (◆), 10 (■), and 15 (●) μM yThg1. Product formation at each concentration of enzyme was plotted as a function of time and fit to a single exponential equation (eq. 1) to yield the observed rate ( $k_{\text{obs}}$ ). (B) Observed rates of adenylylation were plotted as a function of [E] and fit to  $k_{\text{obs}} = k_{\text{on}} * [E]$  to give an estimate of  $k_{\text{on}} = 60 \text{ M}^{-1} \text{ s}^{-1}$ .

**Figure S2: Single turnover ATP dependence of adenylylation at pH 6.** (A) Reactions were performed with 15 μM yThg1 and limiting 5'-[<sup>32</sup>P]tRNA<sup>His</sup> in the presence of 0.1 (●), 0.25 (□), 0.5 (▲), 1 (×), 1.5 (◆), 2 (Δ), and 3 (○), mM ATP. Product formation at each concentration of ATP was plotted as a function of time and fit to a single exponential equation (eq. 1) to yield the observed rate ( $k_{\text{obs}}$ ). (B) Observed rates of adenylylation were plotted as a function of [ATP] and fit to eq. 2 to determine the first-order adenylylation rate constant ( $k_{\text{aden}}$ ) and apparent equilibrium dissociation constant ( $K_{\text{Dapp}}$ ) for p-tRNA<sup>His</sup>.

**Figure S3: Single turnover GTP dependence of nucleotidyl transfer at pH 7.5.** (A) Reactions were carried out with 15 μM yThg1 and limiting p\*pp-tRNA<sup>His</sup> in the presence of 0.4 (×), 1.0 (■), 10 (+), 25 (●), 50 (◇), 100 (▲), 200 (○), and 500 (□) μM GTP. Product formation at each concentration of GTP was plotted as a function of time and fit to a single exponential equation (eq. 1) to yield the observed rate ( $k_{\text{obs}}$ ). (B) Observed rates of nucleotidyl transfer were

plotted as a function of [GTP] and fit to eq. 2 to determine the first-order nucleotidyl transfer rate constant ( $k_{\text{ntrans}}$ ) and apparent equilibrium dissociation constant ( $K_{\text{Dapp}}$ ) for GTP.

**Figure S4: Single turnover analysis of adenylation and nucleotidyl transfer catalyzed by**

**S76A yThg1.** (A) Adenylation reactions were performed with 15  $\mu\text{M}$  yS76A and limiting 5'- $[^{32}\text{P}]\text{tRNA}^{\text{His}}$  in the presence of 0.075 ( $\blacktriangle$ ), 0.25 ( $\blacksquare$ ), 0.5 ( $\blacklozenge$ ), 1 (+), 3 ( $\square$ ), and 5 ( $\bullet$ ) mM ATP.

Product formation at each concentration of ATP was plotted as a function of time and fit to a single exponential equation (eq. 1) to yield the observed rate ( $k_{\text{obs}}$ ).

(B) Nucleotidyl transfer reactions were carried out with 15  $\mu\text{M}$  yS76A and limiting p\*pp-tRNA<sup>His</sup> in the presence of 5 ( $\bullet$ ), 15 ( $\square$ ), 75 ( $\blacktriangle$ ), and 250 ( $\blacklozenge$ )  $\mu\text{M}$  GTP. Product formation at each concentration of GTP was

plotted as a function of time and fit to a single exponential equation (eq. 1) to yield the observed rate ( $k_{\text{obs}}$ ).

Figure S1

A

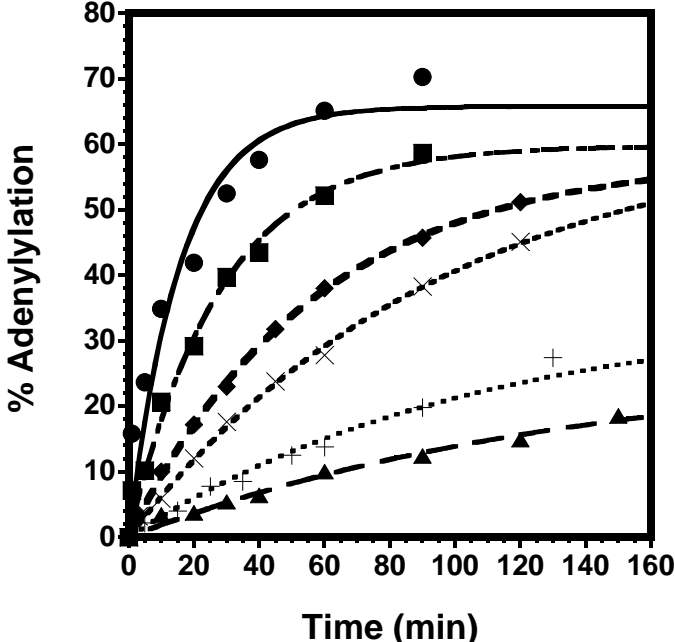

B

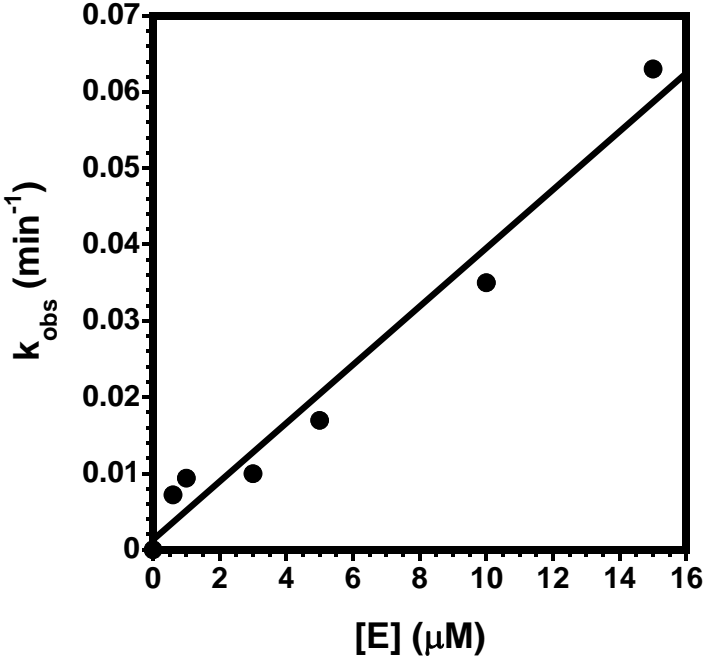

Figure S2

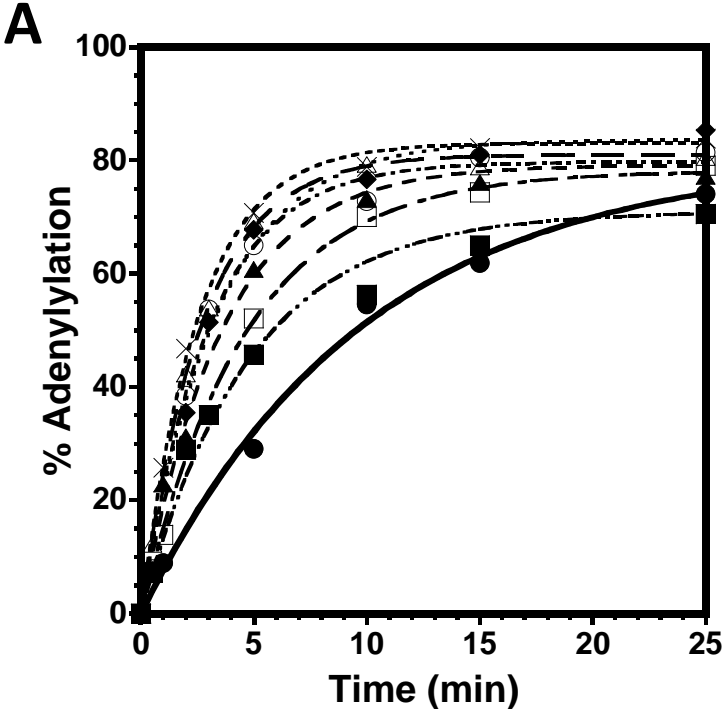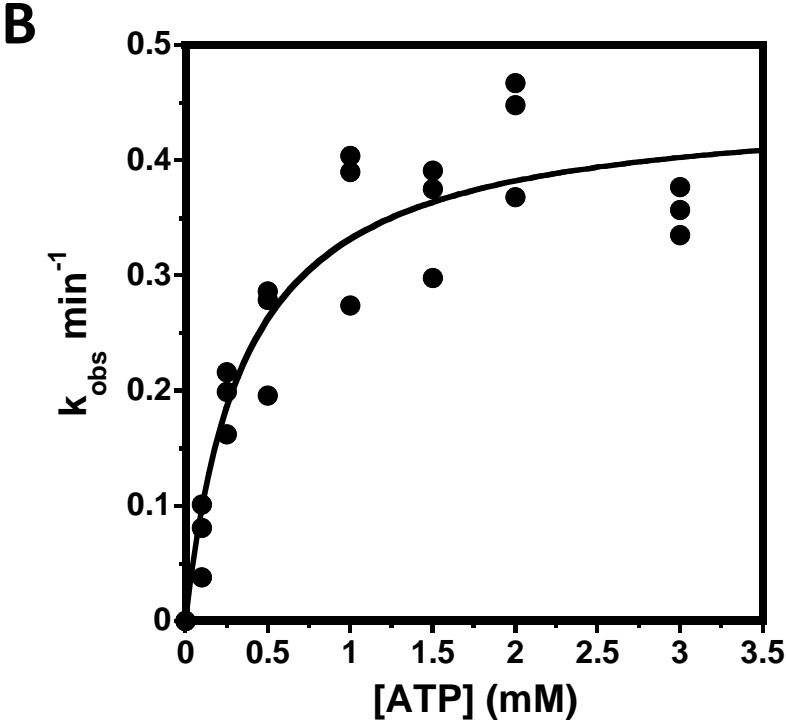

Figure S3

A

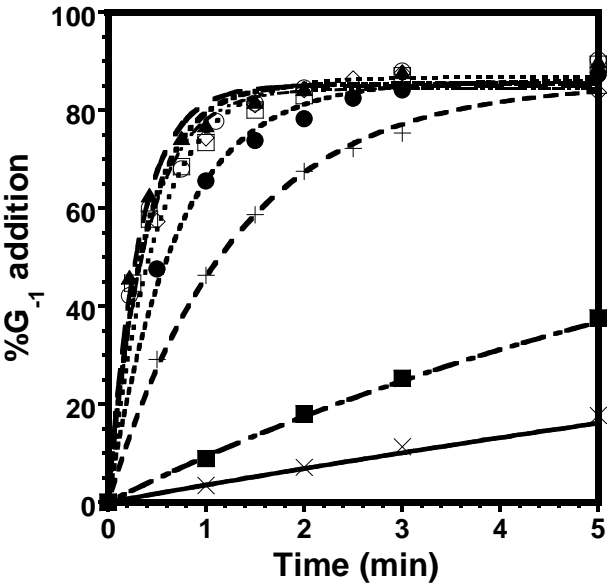

B

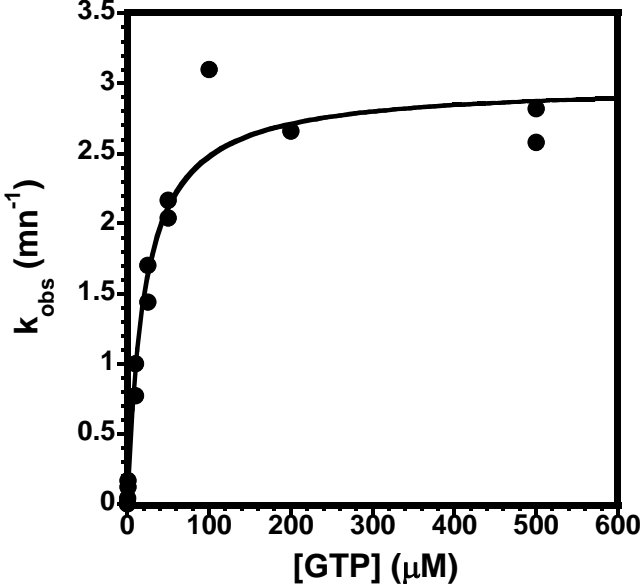

Figure S4

A

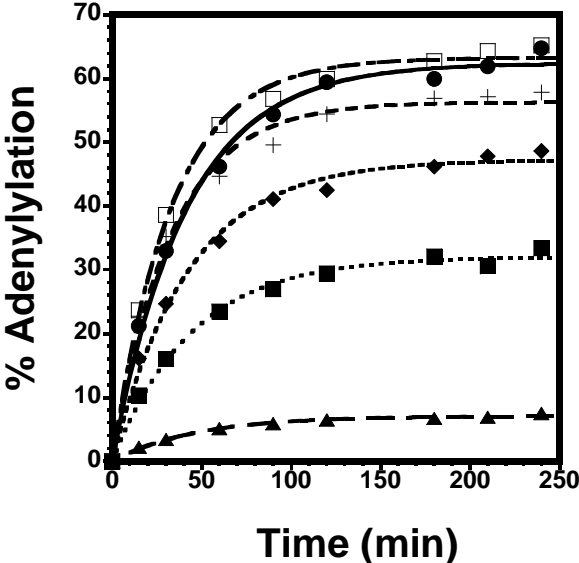

B

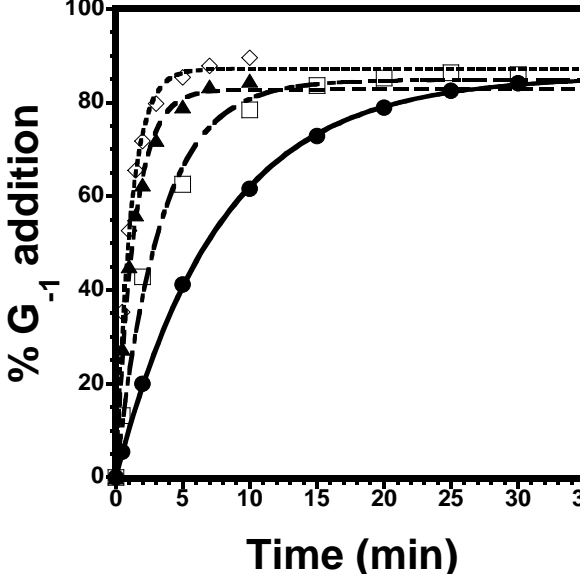

Supplement: NIHMS342780-supplement-1_si_001.pdf [file NIHMS342780-supplement-1_si_001.pdf]
